# Supplementary material
Source: PubMed Central journal article supplement (PMC9036316)
Supplement: NIHMS1794443-supplement-Supple_figs_methods.pdf [file NIHMS1794443-supplement-Supple_figs_methods.pdf]

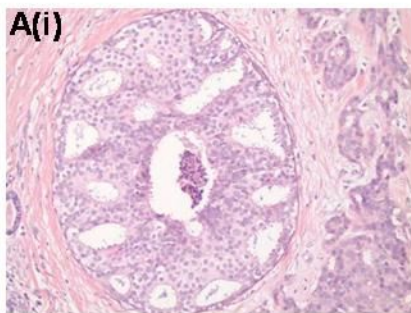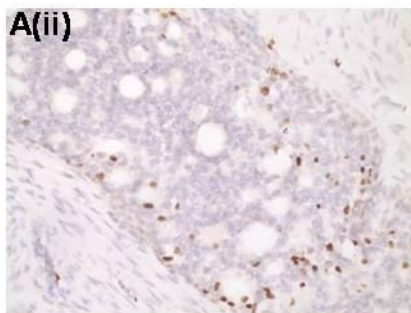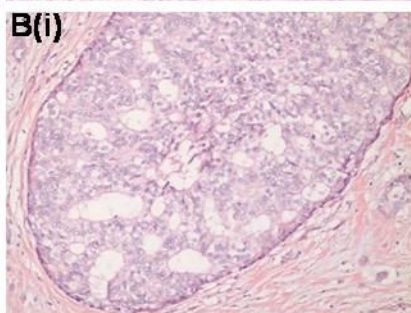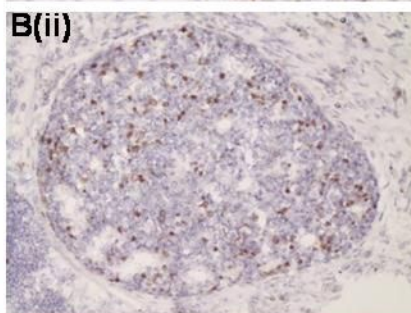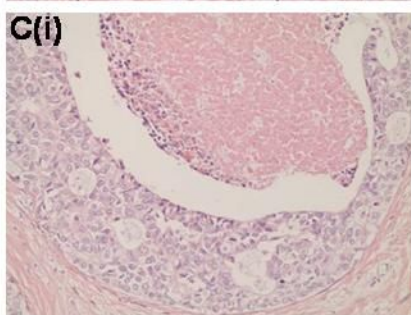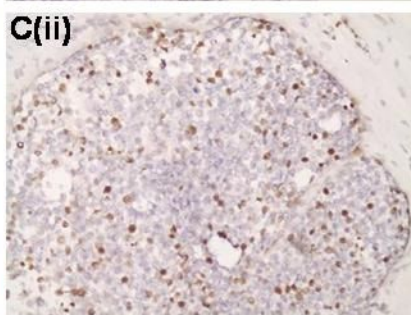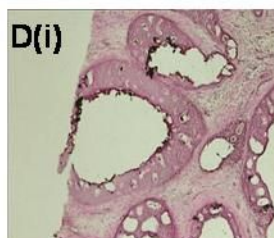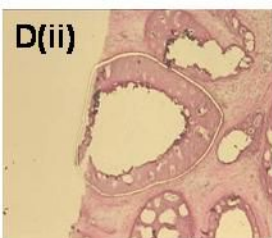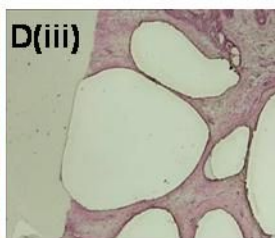

**Supplementary Figure 1**

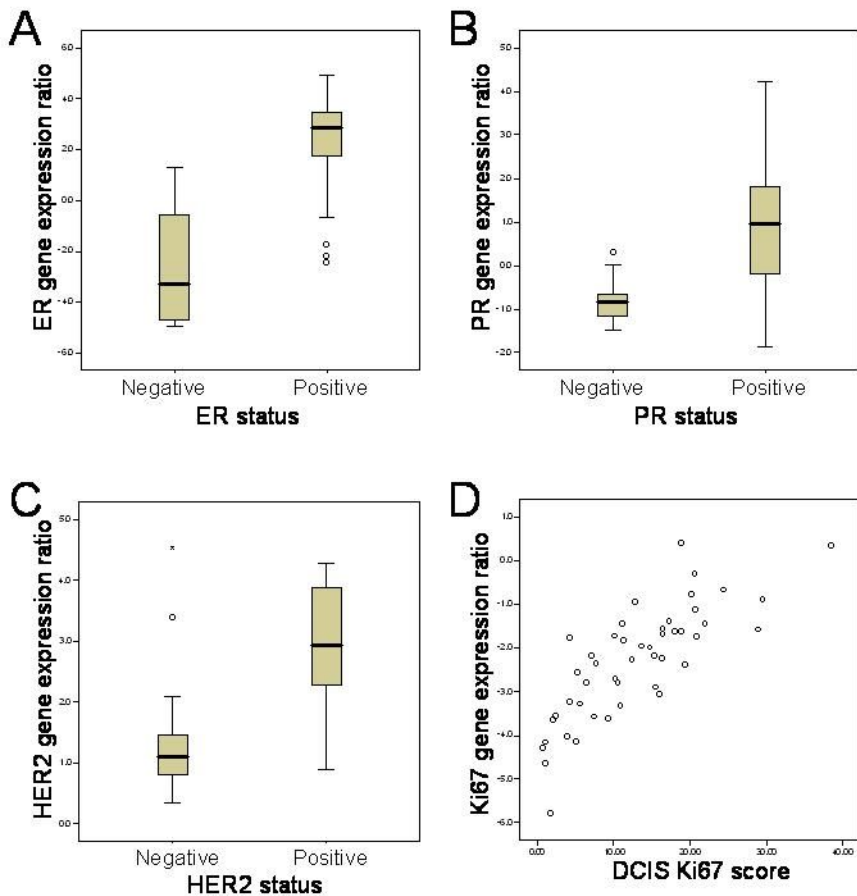

Supplementary Figure 2

**A**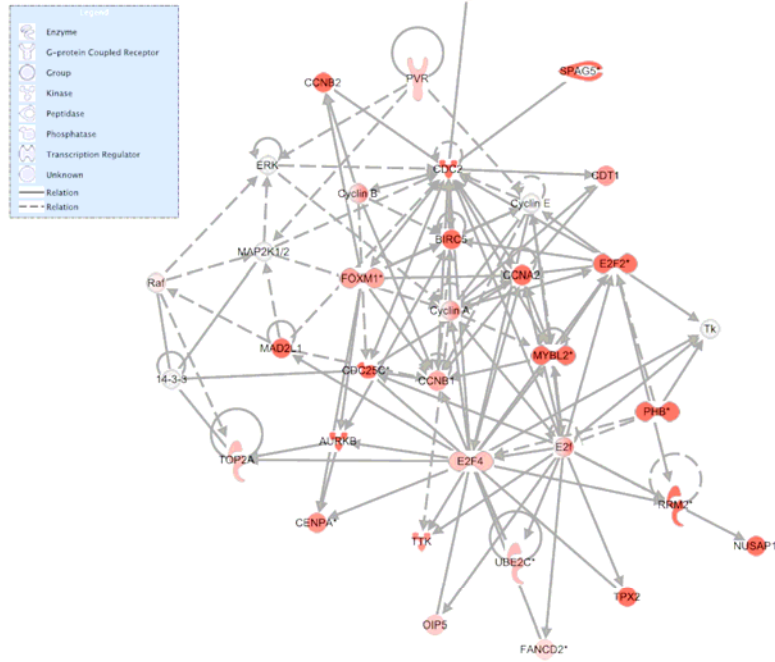**B**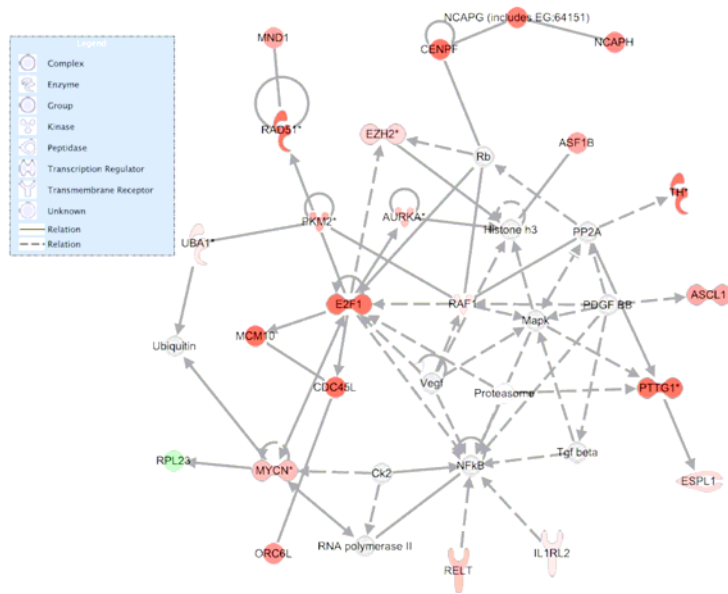

Supplementary Figure 3

## Supplementary Methods

### Determination of tumor ER, PR, HER2 and p53 expression

Results from clinical assessment of tumor estrogen (ER) and progesterone receptor (PR) content were used. For 44 cases these were determined by enzyme immunoassay of tumor cytosol preparations according to a previously described method (1). For both ER and PR, measures of <10fmol/mg protein were regarded as negative. In the remaining 2 cases ER and PR had been determined by immunoperoxidase staining of frozen tissue or fine needle aspiration biopsy material.

Tumor HER2 and p53 expression were determined by immunohistochemical staining of 4µm formalin-fixed paraffin embedded tumor sections that had been stored at 4°C. For HER2, mouse monoclonal anti-human cerbB2 clone CB11 was used at a concentration of 1:40 (Novocastra, Newcastle on Tyne UK), and for p53 mouse monoclonal anti-human p53 BP53.12 at 1:100 (Zymed, CA, USA). For each stain, antigen retrieval was performed by autoclaving at 121°C 15 psi in 0.01M sodium citrate pH 6. Following treatment with H<sub>2</sub>O<sub>2</sub> (3% v/v) to quench endogenous peroxidase and blocking with normal goat serum (50% v/v in phosphate buffered saline), sections were incubated for one hour in a humidification chamber with the primary antibody in 0.5% triton-X 100 in phosphate buffered saline. Sections were subsequently incubated with biotinylated goat-anti-mouse immunoglobulins (Dako, Glostrup Denmark) and avidin-biotin complex (Zymed, CA, USA). Positive results were revealed by treatment with diaminobenzadine (1 mg/ml (w/v), 0.02% (v/v) H<sub>2</sub>O<sub>2</sub>). A positive control section was included in each staining run. For HER2 staining, a negative control section with the primary antibody omitted was included for each case and minor non-specific staining on these sections was taken into account in interpretation of test sections.

HER2 expression was evaluated according to the Dako *HerceptTest* scoring protocol (accessed at [www.dakousa.com](http://www.dakousa.com)) and +++ staining was designated positive. For p53 the proportion of tumor

cells positive was estimated and the pattern of staining was noted (extensive or scattered). Cases were designated p53 positive if >50% of cell nuclei were positively stained in an extensive pattern.

### **RNA and DNA extraction and amplification**

RNA was extracted from microdissected tissue using the *Absolutely RNA Microprep Kit* (Stratagene, CA, USA) and quantitated using the *RiboGreen RNA Quantitation Reagent* (Molecular Probes, OR, USA). RNA quality was assessed by running RNA isolated from each tissue sample on the *Agilent 2100 Bioanalyzer* (Agilent Technologies, Victoria, Australia). This showed a degree of RNA degradation in all samples but 18S and 28S ribosomal bands were clearly distinguished in 39/46 (84.8%) cases. Depending on tissue sample size, 100ng, 50ng or  $\leq 20$ ng of RNA was subject to two rounds of amplification using the *RiboAmp RNA Amplification Kit* (Arcturus, CA, USA). Two-round amplified Stratagene Universal Human Reference RNA (Stratagene, CA, USA) was the reference in gene expression microarray experiments.

DNA was extracted from laser microdissected material using the *QIAamp DNA Micro Kit* (Qiagen Inc., CA, USA) and quantitated using the *PicoGreen dsDNA Quantitation Reagent* (Molecular Probes) both according to the manufacturers instructions. Approximately 10ng of DNA was amplified using the *GenomiPhi DNA Amplification Kit* (Amersham Biosciences, NJ, USA) according to the manufacturer's instructions. Amplified Promega Normal Male DNA (Promega, WI, USA) was used as the reference for array CGH.

### **RNA labeling**

Due to the antisense orientation of the amplified RNA samples, a labeling protocol based on a method published by Schlingemann *et al* (2) was used to generate fluorescent labeled antisense cDNA for hybridization to sense-oriented oligonucleotide microarrays.

One microgram of amplified RNA was incubated for 5 minutes at room temperature in the presence of 0.5 $\mu$ g of pdN6 (Amersham Biosciences) in a total volume of 5.5 $\mu$ L then chilled on ice. Reverse transcription mixture was added, yielding final concentrations of 1X First Strand Buffer (Invitrogen, CA, USA), 10mM DTT (Invitrogen), 500 $\mu$ M each of dATP, dCTP, dGTP, dTTP (Amersham Biosciences), 2U/ $\mu$ L RNasin ribonuclease inhibitor (Promega) and 10U/ $\mu$ L Superscript II reverse transcriptase (Invitrogen) in a total volume of 10 $\mu$ L. The following temperature profile was employed for reverse transcription: 37 $^{\circ}$ C 20 minutes, 42 $^{\circ}$ C 20 minutes, 50 $^{\circ}$ C 10 minutes, 55 $^{\circ}$ C 10 minutes, 65 $^{\circ}$ C 15 minutes; reactions were then held at 37 $^{\circ}$ C. RNase H (Promega) digestion (1U per reaction) was carried out for 30 minutes at 37 $^{\circ}$ C, followed by 2 minutes at 95 $^{\circ}$ C to degrade enzymes. Samples were chilled to 4 $^{\circ}$ C. cDNA labeling by Klenow fragment and amino-allyl incorporation was performed using the Bioprime Kit with a modified protocol. The 10 $\mu$ L cDNA sample (unpurified) was mixed with 90 $\mu$ L of Klenow mixture to yield a reaction mixture that contained 1X random primer solution (Invitrogen), 650 $\mu$ M each of dATP, dCTP, dGTP, 400 $\mu$ M dTTP (Amersham Biosciences), 260 $\mu$ M amino-allyl dUTP (Sigma, MO, USA) and 1.0U/ $\mu$ L Klenow fragment (Invitrogen). DNA polymerization was carried out at 37 $^{\circ}$ C for 16 hours. cDNA was purified using the QIAquick PCR purification kit (Qiagen Inc., CA, USA). Samples were eluted in 30 $\mu$ L DEPC-water (warmed to 50 $^{\circ}$ C) and dried in a speed vac on medium heat. Samples were re-suspended in DEPC-H<sub>2</sub>O and coupled for 1 hour in the dark to the appropriate NHS ester Cy dye (Cy3 or Cy5, Amersham Biosciences) that had been prepared in DMSO and bicarbonate buffer (pH 8.5). Uncoupled dye was removed by cleaning the samples using the QIAquick PCR purification kit. Cleaned probes were eluted in 100 $\mu$ L elution buffer (Qiagen). Individual labeling reactions (Cy3 and Cy5) were analyzed using spectrophotometry by measuring absorbance at 260, 550 (Cy3) and 650nm (Cy5). An arbitrary wavelength (750nm) was also measured to normalize the baselines between samples. The labeled Cy3 and Cy5 probes pairs were combined in an equimolar ratio and concentrated in a speedvac to 18 $\mu$ L. Purified, labeled cDNA was mixed with 1X hybridization buffer (50% formamide, 10XSSC, 0.4% SDS) and 50 $\mu$ g Cot1 DNA and 100 $\mu$ g yeast

tRNA were added to block repetitive sequence elements. Probes were denatured at 95°C for 5 minutes and pre-blocked for 60 minutes at 42°C.

### **DNA labeling**

Three micrograms of amplified test and reference DNA were directly labeled with either Cy3-dUTP or Cy5-dUTP. Bioprime random primer mix (Invitrogen) was added (1X final concentration) to 3µg of diluted DNA; the samples were vortexed, denatured at 98°C for 5 minutes and cooled on ice. Labeling master mix was added containing 120µM each of dATP, dCTP, dGTP, 60µM dTTP (Amersham Biosciences), 2.5nmol Cy3-dUTP or Cy5-dUTP (Amersham Biosciences), 0.8U/µL Klenow Fragment (Invitrogen). Samples were vortexed and incubated in a thermocycler at 37°C for 2 hours. DNA was purified with the QIAquick PCR purification kit and eluted in 30µL Buffer EB (warmed to 50°C) (Qiagen). The labeled Cy3 and Cy5 probes pairs were combined and concentrated in a speedvac to 18µL. A hybridization mix (warmed to 42°C) containing 50µg Cot1 DNA, 100µg yeast tRNA, 50% formamide, 5X SSC and 0.2% SDS was added to each sample. The probe was denatured at 95°C for 5 minutes and pre-blocked by incubation at 42°C for 60 minutes in a water bath.

### **Oligonucleotide microarray hybridization and analysis**

Microarrays were pre-blocked in 5X SSC, 1% BSA and 0.2% SDS at 42°C for 60 minutes. Slides were washed in 2 changes of dH<sub>2</sub>O and 100% isopropanol for 1 minute each prior to drying by centrifugation. Probes were applied to the oligonucleotide microarrays mounted in a Bio-Micro Maui Hybstation and hybridized for 20 hours at 45°C. Following hybridization slides were washed in 0.5XSSC, 0.05% SDS; 2 changes of 0.5XSSC and 0.1XSSC for 5 minutes each and then dried by centrifugation.

Microarray slides were scanned on an Agilent DNA Microarray Scanner. Image analyses were using DeArray software (Scanalytics, VA, USA) (3). The open source statistical environment R ([www.r-project.org](http://www.r-project.org)) was used for statistical analysis. Gene expression microarrays were loess normalized using the limma package (4). Supervised analysis was performed using the limma package from Bioconductor. Except where otherwise noted, gene lists were defined using a false discovery rate (FDR) of 0.05.

### **Microarray based CGH analysis**

Scanning and image analysis of CGH microarrays were as for the gene expression arrays. No normalization was performed.

Segmentation provides a means of “smoothing” the data while maintaining its underlying genomic structure. As part of the segmentation process the “center” of the data, representing the modal copy number, was determined by performing multiple segmentation runs using different offsets for the raw data; the offset that produced the smallest number of probes counted as gained or lost was chosen as the “center” of the data. Doing so corresponds to the hypothesis that the most parsimonious “center” of the data is that which produces the fewest number of aberrant probes. Note that we cannot determine the absolute copy number easily from the CGH data themselves and then aberrations are then measured relative to the centre of the data as defined above.

### **References**

1. Graham JD, Yeates C, Balleine RL, Harvey SS, Milliken JS, Bilous AM, et al. Characterization of progesterone receptor A and B expression in human cancer. *Cancer Res* 1995;55:5063-8.



2. Schlingemann J, Thuerigen O, Ittrich C, Toedt G, Kramer H, Hahn M, et al. Effective transcriptome amplification for expression profiling on sense-oriented oligonucleotide microarrays. *Nucleic Acids Res* 2005;33:e29.
3. Chen Y, Dougherty ER, Bittner ML. Ratio-based decisions and the quantitative analysis of cDNA microarray images. *J Biomed Opt* 1997;2:364-374.
4. Smyth GK, Michaud J, Scott HS. Use of within-array replicate spots for assessing differential expression in microarray experiments. *Bioinformatics* 2005;21:2067-75.

Supplementary Table 1: Detailed cohort characteristics for 46 cases of invasive breast cancer. Concomitant DCIS was present in 45 cases and one case was associated with LCIS only. In six cases with apparently distinct foci of invasive cancer.

| Case # | Sample Type       | Patient Age | Tumor Size | Histological Type | Grade | Tubules | Nuclear Pleomorphism | Mitotic Score | Lymphovascular Invasion | Lymphocytic Infiltrate | LN Status | LN Pos/Neg | Mixed DCIS Morphologies | DCIS Nuclear Grade | DCIS Necrosis | DCIS Calcification | DCIS Cell Polarization |
|--------|-------------------|-------------|------------|-------------------|-------|---------|----------------------|---------------|-------------------------|------------------------|-----------|------------|-------------------------|--------------------|---------------|--------------------|------------------------|
| 1.1    | HG DCIS           | 4           | 4          | 1                 | 3     | 3       | 3                    | 3             |                         |                        | 2         | 1          | 2                       | 3                  | 2             | 1                  | 2                      |
| 2      | DCIS              | 4           | 4          | 1                 | 1     | 2       | 1                    | 1             | 2                       | 2                      | 2         | 1          | 1                       | 1                  | 1             | 2                  | 2                      |
| 2.1    | LCIS              |             |            |                   |       |         |                      |               |                         |                        |           |            |                         |                    |               |                    |                        |
| 2.2    | ADH               |             |            |                   |       |         |                      |               |                         |                        |           |            |                         |                    |               |                    |                        |
| 3      | DCIS              | 4           | 1          | 1                 |       |         |                      |               | 1                       | 2                      | 0         | 0          | 2                       | 2                  | 2             | 2                  | 2                      |
| 3.1    | Benign epithelium |             |            |                   |       |         |                      |               |                         |                        |           |            |                         |                    |               |                    |                        |
| 4      | DCIS              | 3           | 1          | 1                 | 1     | 1       | 2                    | 1             | 1                       | 1                      | 1         | 1          | 2                       | 2                  | 2             | 2                  | 2                      |
| 5      | DCIS              | 2           | 4          | 1                 | 2     | 3       | 2                    | 1             | 2                       | 1                      | 3         | 1          | 1                       | 2                  | 2             | 2                  | 2                      |
| 5.1    | Benign epithelium |             |            |                   |       |         |                      |               |                         |                        |           |            |                         |                    |               |                    |                        |
| 6      | DCIS              | 5           | 3          | 4                 | 1     | 2       | 2                    | 1             | 2                       | 1                      | 1         | 1          | 1                       | 1                  | 1             | 2                  | 2                      |
| 7      | DCIS              | 3           | 3          | 1                 | 3     | 3       | 3                    | 3             | 2                       | 2                      | 1         | 1          | 2                       | 3                  | 2             | 2                  | 2                      |
| 8      | DCIS              | 2           | 3          | 1                 | 2     | 2       | 3                    | 1             | 2                       | 3                      | 3         | 1          | 1                       | 3                  | 2             | 2                  | 2                      |
| 8.1    | Benign epithelium |             |            |                   |       |         |                      |               |                         |                        |           |            |                         |                    |               |                    |                        |
| 9      | DCIS              | 3           | 3          | 1                 | 3     | 3       | 3                    | 2             | 2                       | 2                      | 1         | 1          | 2                       | 3                  | 2             | 2                  | 1                      |
| 9.1    | Benign epithelium |             |            |                   |       |         |                      |               |                         |                        |           |            |                         |                    |               |                    |                        |
| 9.2    | PDWA              |             |            |                   |       |         |                      |               |                         |                        |           |            |                         |                    |               |                    |                        |
| 10     | DCIS              | 6           | 4          | 4                 | 1     | 2       | 2                    | 1             | 1                       | 1                      | 1         | 1          | 2                       | 1                  | 2             | 2                  | 2                      |
| 10.1   | ADH               |             |            |                   |       |         |                      |               |                         |                        |           |            |                         |                    |               |                    |                        |
| 11     | DCIS              | 3           | 1          | 1                 |       |         |                      |               | 2                       | 2                      | 1         | 1          | 1                       | 3                  | 2             | 2                  | 2                      |
| 12     | DCIS              | 3           | 3          | 1                 | 1     | 2       | 2                    | 1             | 1                       | 2                      |           |            | 1                       | 1                  | 1             | 1                  | 2                      |
| 13     | DCIS              | 3           | 5          | 1                 | 2     | 2       | 2                    | 2             | 2                       | 2                      | 3         | 1          | 2                       | 2                  | 2             | 2                  | 2                      |
| 14     | DCIS              | 6           | 2          | 1                 | 2     | 3       | 2                    | 1             | 1                       | 1                      | 0         | 0          | 2                       | 2                  | 2             | 2                  | 2                      |
| 15     | DCIS              | 1           | 4          | 1                 | 2     | 3       | 3                    | 1             | 2                       | 1                      | 2         | 1          | 1                       | 3                  | 2             | 2                  | 2                      |
| 16     | DCIS              | 4           | 3          | 1                 | 1     | 2       | 1                    | 1             | 2                       | 2                      | 1         | 1          | 2                       | 1                  | 2             | 1                  | 2                      |
| 17     | DCIS              | 4           | 4          | 1                 | 2     | 2       | 3                    | 2             | 2                       | 2                      | 0         | 0          | 1                       | 3                  | 2             | 1                  | 1                      |
| 18     | DCIS              | 3           | 4          | 1                 | 2     | 3       | 2                    | 2             | 2                       | 1                      | 0         | 0          | 1                       | 1                  | 2             | 2                  | 2                      |
| 18.1   | ADH               |             |            |                   |       |         |                      |               |                         |                        |           |            |                         |                    |               |                    |                        |
| 19     | DCIS              | 3           | 3          | 1                 | 2     | 2       | 2                    | 2             | 2                       | 3                      | 0         | 0          | 1                       | 3                  | 2             | 1                  | 2                      |
| 20     | DCIS              | 3           | 3          | 1                 | 2     | 2       | 3                    | 2             | 2                       | 2                      | 0         | 0          | 1                       | 3                  | 2             | 1                  | 1                      |
| 20.1   | Benign epithelium |             |            |                   |       |         |                      |               |                         |                        |           |            |                         |                    |               |                    |                        |
| 21     | DCIS              | 6           | 2          | 1                 | 3     | 3       | 3                    | 3             | 2                       | 3                      | 1         | 1          | 1                       | 3                  | 2             | 2                  | 2                      |
| 22     | DCIS              | 4           | 4          | 1                 | 1     | 2       | 2                    | 1             | 2                       | 2                      | 1         | 1          | 1                       | 2                  | 2             | 1                  | 2                      |
| 23     | DCIS              | 3           | 5          | 1                 | 2     | 3       | 2                    | 2             | 1                       | 2                      | 1         | 1          | 2                       | 2                  | 1             | 2                  | 1                      |
| 24     | DCIS              | 4           | 4          | 1                 | 1     | 2       | 2                    | 1             | 2                       | 2                      | 1         | 1          | 2                       | 3                  | 2             | 2                  | 2                      |
| 25     | DCIS              | 3           | 1          | 1                 | 1     | 2       | 1                    | 1             | 2                       | 1                      | 0         | 0          | 2                       | 2                  | 1             | 1                  | 2                      |
| 26     | DCIS              | 5           | 4          | 1                 | 2     | 2       | 3                    | 2             | 2                       | 3                      | 1         | 1          | 1                       | 3                  | 2             | 1                  | 2                      |
| 27     | DCIS              | 4           | 3          | 1                 | 1     | 1       | 2                    | 2             | 1                       | 1                      | 0         | 0          | 1                       | 2                  | 2             | 2                  | 2                      |
| 28     | DCIS              | 3           | 4          | 1                 | 2     | 3       | 2                    | 1             | 2                       | 1                      | 1         | 1          | 1                       | 2                  | 2             | 2                  | 1                      |
| 28.1   | ADH               |             |            |                   |       |         |                      |               |                         |                        |           |            |                         |                    |               |                    |                        |
| 29     | DCIS              | 4           | 2          | 1                 | 3     | 3       | 3                    | 2             | 2                       | 2                      | 0         | 0          | 1                       | 3                  | 2             | 2                  | 2                      |
| 29.1   | Benign epithelium |             |            |                   |       |         |                      |               |                         |                        |           |            |                         |                    |               |                    |                        |
| 30     | DCIS              | 4           | 2          | 1                 | 3     | 3       | 3                    | 3             | 2                       | 2                      | 1         | 1          | 2                       | 3                  | 2             | 2                  | 2                      |
| 31     | DCIS              | 2           | 4          | 1                 | 3     | 3       | 3                    | 3             | 2                       | 2                      | 1         | 1          | 1                       | 3                  | 2             | 2                  | 2                      |
| 32     | DCIS              | 4           | 4          | 1                 | 1     | 1       | 2                    | 1             | 2                       | 2                      | 0         | 0          | 1                       | 2                  | 2             | 1                  | 2                      |
| 34     | DCIS              | 4           | 2          | 3                 | 1     | 1       | 1                    | 1             | 1                       | 1                      | 0         | 0          | 1                       | 1                  | 1             | 2                  | 2                      |
| 35     | DCIS              | 5           | 3          | 1                 | 2     | 3       | 2                    | 2             | 2                       | 2                      | 1         | 1          | 1                       | 2                  | 1             | 1                  | 2                      |
| 37     | IG DCIS           | 5           | 4          | 1                 | 1     | 2       | 2                    | 1             | 2                       | 2                      | 2         | 1          | 2                       | 2                  | 1             | 2                  | 2                      |
| 37.1   | LG DCIS           |             |            |                   |       |         |                      |               |                         |                        |           |            |                         |                    |               |                    |                        |
| 38     | DCIS              | 3           | 1          | 5                 |       |         |                      |               | 2                       | 2                      | 0         | 0          | 1                       | 2                  | 2             | 2                  | 2                      |
| 39     | DCIS              | 3           | 4          | 1                 | 3     | 3       | 3                    | 3             | 2                       | 2                      | 0         | 0          | 1                       | 2                  | 2             | 2                  | 1                      |
| 40     | DCIS              | 2           | 3          | 1                 | 2     | 2       | 2                    | 2             | 1                       | 2                      | 1         | 1          | 1                       | 2                  | 2             | 1                  | 2                      |
| 41     | DCIS              | 3           | 3          | 1                 | 2     | 3       | 2                    | 1             | 2                       | 2                      | 1         | 1          | 2                       | 2                  | 2             | 2                  | 2                      |
| 42     | DCIS              | 4           | 5          | 1                 | 3     | 3       | 3                    | 3             | 2                       | 3                      | 2         | 1          | 1                       | 3                  | 2             | 2                  | 1                      |
| 43     | DCIS              | 5           | 3          | 1                 | 1     | 1       | 1                    | 1             | 1                       | 1                      | 1         | 1          | 1                       | 1                  | 1             | 2                  | 2                      |
| 44     | DCIS              | 1           | 3          | 1                 | 2     | 3       | 2                    | 1             | 1                       | 2                      | 2         | 1          | 1                       | 1                  | 2             | 2                  | 2                      |
| 45     | DCIS              | 3           | 4          | 1                 | 2     | 2       | 3                    | 1             | 2                       | 3                      | 1         | 1          | 1                       | 3                  | 1             | 1                  | 2                      |
| 45.1   | Benign epithelium |             |            |                   |       |         |                      |               |                         |                        |           |            |                         |                    |               |                    |                        |
| 46     | LCIS              | 2           | 4          | 2                 | 3     | 3       | 3                    | 3             | 2                       | 2                      | 1         | 1          | 1                       | 2                  | 2             | 2                  | 1                      |
| 48     | DCIS              | 2           | 3          | 1                 | 2     | 3       | 2                    | 1             | 2                       | 2                      | 1         | 1          | 1                       | 2                  | 2             | 2                  | 2                      |
| 50     | DCIS              | 4           | 3          | 1                 | 2     | 2       | 3                    | 2             | 2                       | 1                      | 1         | 1          | 1                       | 3                  | 2             | 2                  | 2                      |

Abbreviations: DCIS, ductal carcinoma in situ; HG, high nuclear grade; IG, intermediate nuclear grade; LG, low nuclear grade; LCIS, lobular carcinoma in situ; ADH, atypical ductal hyperplasia; PDWA, proliferative disease without atypia

**Key:**

Patient age (years)- 1, 20-29; 2, 30-39; 3, 40-49; 4, 50-59; 5, 60-69; 6, 70-79  
Tumor size (mm)- 1, <5; 2, >5-≤10; 3, >10-≤20; 4, >20-≤50; 5, >50 (represents the size of the invasive lesion only)  
Histological type- 1, ductal NOS; 2, lobular pleomorphic; 3, cribriform; 4, mixed histological types; 5, too small to type  
Invasive Cancer Grade- 1, grade 1; 2, grade 2; 3, grade 3  
Lymphovascular Invasion- 1, Absent; 2, Present  
Lymphocytic Infiltrate- 1, Scant/Absent; 2, Moderate; 3, Prominent  
Lymph Node (LN) Status- 0, no involved nodes; 1, 1-3 positive nodes; 2, 4-9 positive nodes; ≥10 positive nodes  
Lymph node (LN) Pos/Neg- 0, Negative; 1, Positive

Mixed DCIS Morphologies- 1, Uniform; 2, Mixed  
DCIS Nuclear Grade- 1, low nuclear grade; 2, intermediate nuclear grade; 3, high nuclear grade  
DCIS Necrosis- 1, Absent or Punctate necrosis; 2, Comedo necrosis  
DCIS Calcification- 1, Absent; 2, Present (coarse or fine/punctate calcification)  
DCIS Cell Polarization- 1, Absent; 2, Present  
DCIS Architectural Pattern- 1, polarized architecture only (1 or more of cribriform, micropapillary, papillary); 2, mixed polarized and non-polarized architecture; 3, non-polarized architecture only (1 or more of solid, cribriform)

ER (determined by enzyme immunoassay)- 0, negative; 1, positive  
ER level (fmol/mg protein)- 0, ≤10; 1, 11-50; 2, 51-150; 3, >150  
PR (determined by enzyme immunoassay)- 0, negative; 1, positive  
PR level (fmol/mg protein)- 0, ≤10; 1, 11-50; 2, 51-150; 3, >150  
(Note: For 44 cases ER & PR was determined by enzyme immunoassay of tumor cytosol preparations according to a previously described method [1]. For both ER and PR, measures of <10fmol/mg protein were regarded as negative. In the remaining 2 cases ER and PR had been determined by immunoperoxidase staining of frozen tissue or fine needle aspiration biopsy material.)

1. Graham, J.D., et al. Characterization of progesterone receptor A and B expression in human cancer. Cancer Research, 1995. 55(21): p. 5063-8.

HER2 status- 0, negative; 3, positive  
p53 status- 0, negative; 1, positive

DCIS Ki67 score (determined by immunohistochemistry)  
(Note: Values in red represent Ki67 scores derived from paraffin block sections as DCIS had cut out of the frozen tissue block)  
DCIS Ki67 pos cell count- number of positive cells counted  
DCIS Ki67 total cell count- total number of cell counted for Ki67 score (including positive and negative cells)  
(Note: For each score a minimum of 1500 cells were counted if possible or else all available cells were counted with a minimum of 500 cells required).

Gene Expression Group (clustering) - two cluster groups defined by hierarchical clustering of the top 100 grade associated oligonucleotide probes  
GGI - 'gene expression grade index' calculated from expression of 173 grade associated oligonucleotide probes (see Methods and Supplementary Methods for details of GGI calculation)  
Molecular Grade (MG) Group- 0, low molecular grade; 1, high molecular grade (Molecular grade groups were defined using a GGI cut-off of 0)  
High level DNA amplification - 'high level amplification' was defined as a discrete amplification exceeding a threshold corresponding to the 95% of the distribution of segment means (for all tumors, all segments) from the segmentation algorithm.

invasive cancer features were derived from the lesion associated with *in situ* carcinoma sampled for molecular analysis.

| DCIS Architectural Pattern | ER | ER level | PR | PR level | HER2 status | p53 | DCIS Ki67 | DCIS Ki67 pos cell count | DCIS Ki67 total cell count | Gene Expression Group (clustering) |         | GGI | MG Group | High Level Amplifications | ng of RNA amplified with RiboAmp | NIH Oligo Array Expt # | NIH Oligo Array Label | ng of DNA amplified with GenomiPhi | aCGH Expt # | aCGH Array Label |
|----------------------------|----|----------|----|----------|-------------|-----|-----------|--------------------------|----------------------------|------------------------------------|---------|-----|----------|---------------------------|----------------------------------|------------------------|-----------------------|------------------------------------|-------------|------------------|
|                            |    |          |    |          |             |     |           |                          |                            | Expression Group                   | Cluster |     |          |                           |                                  |                        |                       |                                    |             |                  |
| 3                          | 0  | 0        | 0  | 0        | 3           | 0   | 38.54     | 822                      | 2133                       | 2                                  | 3.29    | 1   | 10       | 100                       | 19                               | HV3 35 20              | 10.0                  | 6                                  | HV3 27 54   |                  |
| 1                          |    |          |    |          |             |     | 19.35     | 264                      | 1364                       | 2                                  | 0.73    | 1   | 5        | 100                       | 19                               | HV3 35 22              | 10.0                  | 6                                  | HV3 27 55   |                  |
| 1                          | 1  | 1        | 1  | 2        | 0           | 0   | 0.99      | 15                       | 1510                       | 1                                  | -1.37   | 0   |          | 100                       | 19                               | HV3 35 23              |                       |                                    |             |                  |
|                            |    |          |    |          |             |     |           |                          |                            | 2                                  | 0.29    | 1   |          | 100                       | 19                               | HV3 35 21              |                       |                                    |             |                  |
|                            |    |          |    |          |             |     |           |                          |                            | 1                                  | -1.51   | 0   |          | 20                        | 25                               | HV3 35 58              |                       |                                    |             |                  |
| 1                          | 0  | 0        | 0  | 0        | 0           | 1   | 10.26     | 156                      | 1521                       | 2                                  | 0.22    | 1   | 0        | 100                       | 20                               | HV3 35 27              | 10.0                  | 3                                  | HV3 27 46   |                  |
|                            |    |          |    |          |             |     |           |                          |                            | 1                                  | -1.85   | 0   |          | 20                        | 25                               | HV3 35 59              |                       |                                    |             |                  |
| 1                          | 1  | 3        | 1  | 3        | 0           | 0   | 10.91     | 189                      | 1732                       | 1                                  | -0.86   | 0   | 2        | 100                       | 20                               | HV3 35 28              | 10.0                  | 6                                  | HV3 27 56   |                  |
| 2                          | 1  | 1        | 1  | 2        | 0           |     | 20.68     | 375                      | 1813                       | 2                                  | 1.04    | 1   | 2        | 100                       | 20                               | HV3 35 29              | 10.0                  | 7                                  | HV3 27 57   |                  |
|                            |    |          |    |          |             |     |           |                          |                            | 1                                  | -1.36   | 0   |          | <20                       | 26                               | HV3 35 70              |                       |                                    |             |                  |
| 1                          | 1  | 3        | 1  | 1        | 0           | 0   | 9.27      | 166                      | 1791                       | 1                                  | -0.62   | 0   | 5        | 100                       | 22                               | HV3 35 33              | 10.0                  | 7                                  | HV3 27 58   |                  |
| 2                          | 1  | 1        | 0  | 0        | 3           | 0   | 11.18     | 170                      | 1521                       | 2                                  | 1.57    | 1   | 6        | 100                       | 23                               | HV3 35 38              | 10.0                  | 7                                  | HV3 27 59   |                  |
| 2                          | 1  | 1        | 1  | 1        | 3           | 1   | 18.79     | 296                      | 1575                       | 2                                  | 1.28    | 1   | 8        | 100                       | 26                               | HV3 35 60              | 10.0                  | 7                                  | HV3 27 60   |                  |
|                            |    |          |    |          |             |     |           |                          |                            | 1                                  | -1.53   | 0   |          | 20                        | 26                               | HV3 35 71              |                       |                                    |             |                  |
|                            |    |          |    |          |             |     |           |                          |                            | 2                                  | 3.50    | 1   | 10       | 100                       | 22                               | HV3 35 34              | 10.0                  | 8                                  | HV3 27 61   |                  |
|                            |    |          |    |          |             |     |           |                          |                            | 1                                  | -1.91   | 0   |          | 20                        | 26                               | HV3 35 63              |                       |                                    |             |                  |
|                            |    |          |    |          |             |     |           |                          |                            | 2                                  | -0.11   | 0   |          | 20                        | 27                               | HV3 35 79              |                       |                                    |             |                  |
| 2                          | 1  | 2        | 1  | 2        | 0           | 0   | 2.11      | 36                       | 1703                       | 1                                  | -1.34   | 0   | 1        | 100                       | 22                               | HV3 35 35              | 10.0                  | 8                                  | HV3 27 62   |                  |
|                            |    |          |    |          |             |     |           |                          |                            | 1                                  | -1.98   | 0   | 0        | 20                        | 26                               | HV3 35 64              | 10.0                  | 17                                 | HV3 27 97   |                  |
| 2                          | 0  | 0        | 0  | 0        | 3           | 0   | 29.52     | 498                      | 1687                       | 2                                  | 1.57    | 1   | 11       | 100                       | 26                               | HV3 35 61              | 10.0                  | 5                                  | HV3 27 51   |                  |
| 1                          | 1  | 1        | 1  | 3        | 0           | 0   | 5.39      | 89                       | 1651                       | 1                                  | -0.71   | 0   | 1        | 20                        | 19                               | HV3 35 24              | 6.0                   | 8                                  | HV3 27 63   |                  |
| 1                          | 1  | 2        | 1  | 3        | 0           | 0   | 21.94     | 375                      | 1709                       | 2                                  | 0.96    | 1   | 3        | 100                       | 26                               | HV3 35 62              | 10.0                  | 8                                  | HV3 27 64   |                  |
| 1                          | 1  | 3        | 1  | 3        | 0           | 0   | 12.45     | 222                      | 1783                       | 1                                  | -0.67   | 0   | 0        | 100                       | 26                               | HV3 35 86              | 10.0                  | 9                                  | HV3 27 65   |                  |
| 2                          | 1  | 2        | 1  | 2        | 0           | 0   | 13.74     | 235                      | 1710                       | 2                                  | 1.07    | 1   | 7        | 100                       | 22                               | HV3 35 36              | 10.0                  | 9                                  | HV3 27 66   |                  |
| 1                          | 1  | 3        | 1  | 1        | 0           | 0   | 4.23      | 64                       | 1512                       | 1                                  | -1.28   | 0   | 1        | 100                       | 26                               | HV3 35 87              | 10.0                  | 9                                  | HV3 27 67   |                  |
| 3                          | 0  | 0        | 0  | 0        | 3           | 0   | 16.47     | 273                      | 1658                       | 2                                  | 0.49    | 1   | 20       | 100                       | 26                               | HV3 35 68              | 10.0                  | 9                                  | HV3 27 68   |                  |
| 2                          | 1  | 2        | 1  | 3        | 0           | 0   | 2.42      | 39                       | 1611                       | 1                                  | -0.81   | 0   | 0        | 100                       | 25                               | HV3 35 52              | 10.0                  | 10                                 | HV3 27 69   |                  |
|                            |    |          |    |          |             |     |           |                          |                            | 1                                  | -0.69   | 0   | 1        | <20                       | 27                               | HV3 35 80              | 0.6                   | 16                                 | HV3 27 93   |                  |
| 2                          | 1  | 1        | 1  | 3        | 3           | 0   | 11.23     | 189                      | 1683                       | 2                                  | 0.44    | 1   | 2        | 100                       | 23                               | HV3 35 40              | 10.0                  | 17                                 | HV3 27 98   |                  |
| 3                          | 0  | 0        | 1  | 1        | 0           | 1   | 15.26     | 98                       | 642                        | 2                                  | 1.37    | 1   | 0        | 100                       | 22                               | HV3 35 37              | 10.0                  | 10                                 | HV3 27 70   |                  |
|                            |    |          |    |          |             |     |           |                          |                            | 1                                  | -0.41   | 0   |          | 20                        | 26                               | HV3 35 65              |                       |                                    |             |                  |
| 2                          | 1  | 1        | 0  | 0        | 0           | 0   | 20.62     | 386                      | 1872                       | 2                                  | 2.15    | 1   | 5        | 100                       | 23                               | HV3 35 39              | 10.0                  | 10                                 | HV3 27 71   |                  |
| 2                          | 1  | 3        | 1  | 2        | 0           | 0   | 4.04      | 72                       | 1781                       | 1                                  | -1.64   | 0   | 1        | 100                       | 25                               | HV3 35 33              | 10.0                  | 10                                 | HV3 27 72   |                  |
| 3                          | 1  | 2        | 1  | 2        | 0           | 0   | 12.81     | 217                      | 1694                       | 2                                  | 0.25    | 1   | 5        | 100                       | 23                               | HV3 35 41              | 10.0                  | 11                                 | HV3 27 73   |                  |
| 2                          | 1  | 1        | 1  | 1        | 3           | 1   | 14.72     | 236                      | 1603                       | 2                                  | 1.12    | 1   | 10       | 100                       | 23                               | HV3 35 42              | 10.0                  | 11                                 | HV3 27 74   |                  |
| 2                          | 1  | 2        | 1  | 3        | 0           | 0   | 7.43      | 135                      | 1818                       | 1                                  | -1.03   | 0   | 1        | 100                       | 24                               | HV3 35 44              | 10.0                  | 6                                  | HV3 27 53   |                  |
| 2                          | 0  | 0        | 0  | 0        | 0           | 0   | 16.47     | 272                      | 1651                       | 2                                  | 0.94    | 1   | 6        | 100                       | 24                               | HV3 35 45              | 10.0                  | 19                                 | HV3 27 42   |                  |
| 1                          | 1  | 1        | 1  | 3        | 0           | 0   | 7.14      | 101                      | 1414                       | 1                                  | -0.84   | 0   | 2        | 50                        | 24                               | HV3 35 46              | 10.0                  | 11                                 | HV3 27 75   |                  |
| 3                          | 1  | 1        | 1  | 3        | 0           | 0   | 17.98     | 280                      | 1557                       | 2                                  | 1.26    | 1   | 1        | 50                        | 23                               | HV3 35 43              | 10.0                  | 17                                 | HV3 27 99   |                  |
|                            |    |          |    |          |             |     |           |                          |                            | 1                                  | -0.62   | 0   | 5        | <20                       | 27                               | HV3 35 81              | 1.4                   | 16                                 | HV3 27 94   |                  |
| 2                          | 1  | 3        | 0  | 0        | 0           | 0   | 6.5       | 129                      | 1984                       | 2                                  | 1.35    | 1   | 3        | 100                       | 24                               | HV3 35 47              | 10.0                  | 11                                 | HV3 27 76   |                  |
|                            |    |          |    |          |             |     |           |                          |                            | 1                                  | -1.75   | 0   |          | <20                       | 27                               | HV3 35 82              |                       |                                    |             |                  |
| 2                          | 1  | 2        | 1  | 1        | 0           | 0   | 20.22     | 333                      | 1647                       | 2                                  | 1.38    | 1   | 6        | 100                       | 24                               | HV3 35 49              | 10.0                  | 12                                 | HV3 27 77   |                  |
| 2                          | 1  | 1        | 1  | 1        | 0           | 0   | 10.23     | 163                      | 1594                       | 2                                  | 1.92    | 1   | 2        | 100                       | 24                               | HV3 35 50              | 10.0                  | 12                                 | HV3 27 79   |                  |
| 2                          | 1  | 2        | 1  | 3        | 0           | 0   | 5.64      | 97                       | 1720                       | 1                                  | -1.36   | 0   | 1        | 20                        | 25                               | HV3 35 54              | 10.0                  | 12                                 | HV3 27 78   |                  |
| 1                          | 1  | 2        | 1  | 2        |             |     | 1.74      | 23                       | 1324                       | 1                                  | -2.15   | 0   | 1        | 50                        | 25                               | HV3 35 55              | 10.0                  | 12                                 | HV3 27 80   |                  |
| 2                          | 1  | 3        | 1  | 3        | 0           | 0   | 7.7       | 117                      | 1519                       | 1                                  | -0.52   | 0   | 2        | <20                       | 25                               | HV3 35 56              | 10.0                  | 13                                 | HV3 27 81   |                  |
| 2                          | 1  | 3        | 1  | 2        | 0           | 0   | 4.36      | 59                       | 1352                       | 1                                  | -0.27   | 0   | 0        | <20                       | 26                               | HV3 35 69              | 1.7                   | 13                                 | HV3 27 82   |                  |
| 1                          |    |          |    |          |             |     | 1.02      | 16                       | 1562                       | 1                                  | -1.43   | 0   | 0        | <20                       | 25                               | HV3 35 57              | 10.0                  | 13                                 | HV3 27 83   |                  |
| 2                          | 1  | 2        | 1  | 3        | 0           | 0   | 10.59     | 160                      | 1511                       | 1                                  | -0.32   | 0   | 2        | 100                       | 19                               | HV3 35 25              | 10.0                  | 5                                  | HV3 27 52   |                  |
| 3                          | 1  | 3        | 1  | 3        | 0           | 1   | 28.94     | 257                      | 888                        | 2                                  | 1.22    | 1   | 11       | 20                        | 20                               | HV3 35 30              | 10.0                  | 13                                 | HV3 27 84   |                  |
| 1                          | 1  | 3        | 1  | 3        | 0           | 0   |           |                          |                            | 1                                  | -0.19   | 0   | 7        | <20                       | 27                               | HV3 35 72              | 10.0                  | 16                                 | HV3 27 95   |                  |
| 1                          | 1  | 1        | 0  | 0        | 0           | 0   | 5.07      | 79                       | 1559                       | 1                                  | -2.38   | 0   | 8        | 20                        | 20                               | HV3 35 31              | 10.0                  | 14                                 | HV3 27 85   |                  |
| 3                          | 1  | 3        | 1  | 1        | 0           | 1   | 17.29     | 153                      | 885                        | 2                                  | 2.37    | 1   | 30       | 20                        | 27                               | HV3 35 73              | 5.9                   | 16                                 | HV3 27 96   |                  |
| 2                          | 1  | 1        | 1  | 2        | 0           | 0   | 0.78      | 13                       | 1670                       | 1                                  | -1.32   | 0   | 1        | <20                       | 20                               | HV3 35 32              | 3.7                   | 14                                 | HV3 27 86   |                  |
| 1                          | 1  | 2        | 1  | 3        | 0           | 0   | 16        | 296                      | 1850                       | 1                                  | -0.46   | 0   | 5        | 50                        | 27                               | HV3 35 74              | 10.0                  | 14                                 | HV3 27 87   |                  |
| 2                          | 0  | 0        | 1  | 2        | 3           | 1   | 16.41     | 147                      | 896                        | 2                                  | 0.32    | 1   | 1        | <20                       | 27                               | HV3 35 75              | 1.9                   | 14                                 | HV3 27 88   |                  |
|                            |    |          |    |          |             |     |           |                          |                            | 1                                  | -1.87   | 0   |          | 20                        | 27                               | HV3 35 83              |                       |                                    |             |                  |
| 3                          | 1  | 2        | 1  | 2        | 0           | 0   | 15.56     | 239                      | 1536                       | 1                                  | -0.41   | 0   | 10       | 100                       | 27                               | HV3 35 76              | 10.0                  | 15                                 | HV3 27 89   |                  |
| 2                          | 1  | 1        | 1  | 1        | 0           | 0   | 24.47     | 391                      | 1598                       | 2                                  | 1.57    | 1   | 7        | 50                        | 27                               | HV3 35 77              | 10.0                  | 15                                 | HV3 27 91   |                  |
| 2                          | 1  | 1        | 0  | 0        | 3           | 0   | 20.84     | 373                      | 1790                       | 2                                  | 0.38    | 1   | 9        | 100                       | 27                               | HV3 35 78              | 10.0                  | 15                                 | HV3 27 92   |                  |

**Supplementary Table 2: List of oligonucleotide probes significantly differentially expressed between DCIS lesions associated with grade 1 and grade 3 invasive cancer**

| Rank | oligo      | symbol_from_entrez_gene | description_from_entrez_gene                          | chrom | unigene   | M     | A      | t     | P.Value | adj.P.Val | B      |
|------|------------|-------------------------|-------------------------------------------------------|-------|-----------|-------|--------|-------|---------|-----------|--------|
| 1    | H300003937 | EME1                    | essential meiotic endonuclease 1 homolog 1 (S. pombe) | 17    | Hs.514330 | 3.206 | 11.028 | 7.306 | 0.000   | 0.0002    | 10.107 |
| 2    | H200010726 | E2F1                    | E2F transcription factor 1                            | 20    | Hs.558118 | 2.321 | 13.643 | 6.738 | 0.000   | 0.0005    | 8.447  |
| 3    | H300004854 | NA                      | NA                                                    | 15    | NA        | 2.113 | 10.082 | 6.684 | 0.000   | 0.0005    | 8.289  |
| 4    | H300020138 | FLJ10719                | hypothetical protein FLJ10719                         | 15    | Hs.513126 | 1.451 | 11.746 | 6.276 | 0.000   | 0.0014    | 7.080  |
| 5    | H200012382 | GTSE1                   | G-2 and S-phase expressed 1                           | 22    | Hs.386189 | 2.272 | 9.529  | 6.144 | 0.000   | 0.0014    | 6.688  |
| 6    | H300001120 | C8orf38                 | chromosome 8 open reading frame 38                    | 8     | NA        | 1.874 | 11.119 | 6.113 | 0.000   | 0.0014    | 6.597  |
| 7    | H300006537 | NA                      | NA                                                    | 15    | Hs.112160 | 2.289 | 8.769  | 6.051 | 0.000   | 0.0014    | 6.413  |
| 8    | H200011914 | CDC45L                  | CDC45 cell division cycle 45-like (S. cerevisiae)     | 22    | NA        | 1.828 | 5.676  | 6.166 | 0.000   | 0.0014    | 6.328  |
| 9    | H300003796 | BIRC5                   | baculoviral IAP repeat-containing 5 (survivin)        | 17    | Hs.514527 | 2.198 | 13.796 | 6.002 | 0.000   | 0.0015    | 6.266  |
| 10   | H200015433 | E2F2                    | E2F transcription factor 2                            | 1     | Hs.194333 | 2.236 | 11.184 | 5.970 | 0.000   | 0.0015    | 6.170  |
| 11   | H200019974 | RAD51                   | RAD51 homolog (RecA homolog, E. coli) (S. cerevisiae) | 15    | NA        | 1.707 | 12.069 | 5.921 | 0.000   | 0.0016    | 6.026  |
| 12   | H300022790 | ADC                     | arginine decarboxylase                                | 1     | Hs.101807 | 2.400 | 6.926  | 5.892 | 0.000   | 0.0016    | 5.929  |
| 13   | H200012628 | DTL                     | denticleless homolog (Drosophila)                     | 1     | Hs.126774 | 1.422 | 10.725 | 5.874 | 0.000   | 0.0016    | 5.886  |
| 14   | H200006808 | MKI67                   | antigen identified by monoclonal antibody Ki-67       | 10    | Hs.80976  | 2.392 | 11.832 | 5.850 | 0.000   | 0.0016    | 5.815  |
| 15   | H200005673 | KIF2C                   | kinesin family member 2C                              | 1     | Hs.69360  | 2.142 | 12.496 | 5.745 | 0.000   | 0.0021    | 5.502  |
| 16   | H200014659 | CCNB2                   | cyclin B2                                             | 15    | NA        | 2.229 | 12.525 | 5.672 | 0.000   | 0.0024    | 5.285  |
| 17   | H300002397 | PTTG1                   | pituitary tumor-transforming 1                        | 8     | Hs.350966 | 1.660 | 12.403 | 5.667 | 0.000   | 0.0024    | 5.270  |
| 18   | H200008012 | TROAP                   | trophinin associated protein (tastin)                 | 12    | Hs.524399 | 1.287 | 7.461  | 5.651 | 0.000   | 0.0024    | 5.221  |
| 19   | H200010755 | TM4SF19                 | transmembrane 4 L six family member 19                | 3     | Hs.135997 | 1.371 | 9.383  | 5.591 | 0.000   | 0.0026    | 5.045  |
| 20   | H300010830 | ISG20L1                 | interferon stimulated exonuclease gene 20kDa-like 1   | 15    | Hs.436102 | 1.544 | 10.715 | 5.581 | 0.000   | 0.0026    | 5.014  |
| 21   | H200015825 | C9orf100                | chromosome 9 open reading frame 100                   | 9     | Hs.277026 | 1.920 | 8.700  | 5.571 | 0.000   | 0.0026    | 4.984  |

|    |            |         |                                                             |                 |        |        |        |       |        |       |
|----|------------|---------|-------------------------------------------------------------|-----------------|--------|--------|--------|-------|--------|-------|
| 22 | H200000307 | BRRN1   | barren homolog (Drosophila)                                 | 2 Hs.308045     | 1.466  | 8.934  | 5.563  | 0.000 | 0.0026 | 4.960 |
| 23 | H200004844 | EXO1    | exonuclease 1                                               | 1 Hs.498248     | 2.453  | 11.054 | 5.553  | 0.000 | 0.0026 | 4.932 |
| 24 | H200000064 | FOXM1   | forkhead box M1                                             | 12 Hs.239  Hs.: | 1.314  | 11.322 | 5.491  | 0.000 | 0.0029 | 4.747 |
| 25 | H200005853 | KIF20A  | kinesin family member 20A                                   | 5 Hs.73625      | 2.139  | 13.401 | 5.490  | 0.000 | 0.0029 | 4.745 |
| 26 | H200008454 | AURKB   | aurora kinase B                                             | 17 NA           | 1.822  | 12.400 | 5.486  | 0.000 | 0.0029 | 4.732 |
| 27 | H200013545 | MGC2408 | hypothetical protein MGC2408                                | 3 NA            | 1.624  | 10.382 | 5.467  | 0.000 | 0.0029 | 4.675 |
| 28 | H200004950 | ORC6L   | origin recognition complex, subunit 6 homolog-like (yeast)  | 16 Hs.49760     | 1.424  | 8.539  | 5.463  | 0.000 | 0.0029 | 4.662 |
| 29 | H300007595 | PTTG1   | pituitary tumor-transforming 1                              | 4 Hs.350966     | 1.673  | 12.615 | 5.433  | 0.000 | 0.0031 | 4.574 |
| 30 | H300013861 | NA      | NA                                                          | 12 Hs.37044     | 1.703  | 9.302  | 5.349  | 0.000 | 0.0038 | 4.328 |
| 31 | H300013227 | MYBL2   | v-myb myeloblastosis viral oncogene homolog (avian)-like 2  | 20 Hs.179718    | 2.836  | 12.649 | 5.343  | 0.000 | 0.0038 | 4.307 |
| 32 | H300020211 | KIF2C   | kinesin family member 2C                                    | 1 Hs.69360      | 1.824  | 11.182 | 5.331  | 0.000 | 0.0038 | 4.274 |
| 33 | H200017540 | NUSAP1  | nucleolar and spindle associated protein 1                  | 15 Hs.511093    | 2.165  | 12.775 | 5.322  | 0.000 | 0.0038 | 4.247 |
| 34 | H200006072 | RRM2    | ribonucleotide reductase M2 polypeptide                     | 2 Hs.226390     | 2.148  | 13.435 | 5.311  | 0.000 | 0.0038 | 4.213 |
| 35 | H200008371 | MYBL2   | v-myb myeloblastosis viral oncogene homolog (avian)-like 2  | 20 Hs.179718    | 2.898  | 11.737 | 5.309  | 0.000 | 0.0038 | 4.207 |
| 36 | H300012511 | NA      | NA                                                          | 12 NA           | 0.839  | 9.340  | 5.290  | 0.000 | 0.0040 | 4.152 |
| 37 | H300002127 | C8orf16 | chromosome 8 open reading frame 16                          | 8 Hs.59115      | -1.984 | 7.950  | -5.244 | 0.000 | 0.0045 | 4.017 |
| 38 | H300008715 | NA      | NA                                                          | 11 Hs.375110    | -0.632 | 6.980  | -5.227 | 0.000 | 0.0046 | 3.966 |
| 39 | H300001422 | CDT1    | DNA replication factor                                      | 16 Hs.122908    | 1.341  | 9.928  | 5.219  | 0.000 | 0.0046 | 3.944 |
| 40 | H200007139 | CCNA2   | cyclin A2                                                   | 4 Hs.85137      | 2.004  | 12.061 | 5.173  | 0.000 | 0.0051 | 3.807 |
| 41 | H200010558 | UBE2C   | ubiquitin-conjugating enzyme E2C                            | 20 Hs.93002     | 1.076  | 12.574 | 5.171  | 0.000 | 0.0051 | 3.800 |
| 42 | H200003981 | CDCA3   | cell division cycle associated 3                            | 7 NA            | 1.295  | 7.799  | 5.133  | 0.000 | 0.0057 | 3.689 |
| 43 | H300006651 | DEFB127 | defensin, beta 127                                          | 20 Hs.99362     | 1.435  | 8.040  | 5.114  | 0.000 | 0.0059 | 3.632 |
| 44 | H200003232 | CDCA5   | cell division cycle associated 5                            | 11 Hs.434886    | 1.257  | 12.841 | 5.132  | 0.000 | 0.0061 | 3.565 |
| 45 | H300001057 | NA      | NA                                                          | 20 NA           | 1.691  | 7.516  | 5.042  | 0.000 | 0.0071 | 3.421 |
| 46 | H300005482 | NUDT1   | nudix (nucleoside diphosphate linked moiety X)-type motif 1 | 7 NA            | 1.202  | 12.823 | 5.035  | 0.000 | 0.0071 | 3.401 |

|    |            |           |                                                                                                                                                                                          |              |        |        |        |       |        |       |
|----|------------|-----------|------------------------------------------------------------------------------------------------------------------------------------------------------------------------------------------|--------------|--------|--------|--------|-------|--------|-------|
| 47 | H200001767 | TPX2      | TPX2, microtubule-associated, homolog (Xenopus laevis)                                                                                                                                   | 20 Hs.244580 | 1.882  | 12.817 | 5.024  | 0.000 | 0.0071 | 3.368 |
| 48 | H300008454 | PTTG1     | pituitary tumor-transforming 1                                                                                                                                                           | 5 Hs.511755  | 1.468  | 9.866  | 5.021  | 0.000 | 0.0071 | 3.361 |
| 49 | H200013932 | SLC35B1   | solute carrier family 35, member B1                                                                                                                                                      | 17 NA        | 1.708  | 13.987 | 4.986  | 0.000 | 0.0078 | 3.257 |
| 50 | H300009764 | FLJ34790  | hypothetical protein FLJ34790                                                                                                                                                            | 17 Hs.121692 | -0.936 | 10.695 | -4.981 | 0.000 | 0.0078 | 3.244 |
| 51 | H200007186 | FAM64A    | family with sequence similarity 64, member A                                                                                                                                             | 17 Hs.404323 | 1.765  | 8.583  | 4.957  | 0.000 | 0.0082 | 3.174 |
| 52 | H300012966 | SLC35B4   | solute carrier family 35, member B4                                                                                                                                                      | 7 Hs.490181  | 1.150  | 11.709 | 4.955  | 0.000 | 0.0082 | 3.167 |
| 53 | H300000019 | ASCL1     | achaete-scute complex-like 1 (Drosophila)                                                                                                                                                | 12 Hs.524672 | 1.271  | 8.308  | 4.943  | 0.000 | 0.0083 | 3.131 |
| 54 | H300006630 | GPR35     | G protein-coupled receptor 35                                                                                                                                                            | 2 Hs.239891  | 1.074  | 7.547  | 4.926  | 0.000 | 0.0086 | 3.084 |
| 55 | H300015294 | NA        | NA                                                                                                                                                                                       | 12 NA        | 1.001  | 11.421 | 4.817  | 0.000 | 0.0121 | 2.765 |
| 56 | H200003654 | ASF1B     | ASF1 anti-silencing function 1 homolog B (S. cerevisiae)                                                                                                                                 | 19 Hs.558081 | 1.299  | 9.405  | 4.804  | 0.000 | 0.0124 | 2.727 |
| 57 | H200002977 | SPBC25    | spindle pole body component 25 homolog (S. cerevisiae)                                                                                                                                   | 2 Hs.421956  | 1.074  | 10.331 | 4.790  | 0.000 | 0.0127 | 2.686 |
| 58 | H300021897 | MGC3130   | hypothetical protein MGC3130                                                                                                                                                             | 17 Hs.437059 | 1.301  | 8.053  | 4.774  | 0.000 | 0.0131 | 2.640 |
| 59 | H300004086 | LOC440406 | U similar to Ubiquitin-conjugating enzyme E2S (Ubiquitin-conjugating enzyme E2-24 kDa) (Ubiquitin-protein ligase) (Ubiquitin carrier protein) (E2-EPF5) Ubiquitin-conjugating enzyme E2S | 17 Hs.462306 | 1.634  | 8.559  | 4.761  | 0.000 | 0.0133 | 2.601 |
| 60 | H200000012 | CEACAM8   | carcinoembryonic antigen-related cell adhesion molecule 8                                                                                                                                | 19 Hs.41     | 0.763  | 9.121  | 4.760  | 0.000 | 0.0133 | 2.601 |
| 61 | H300000739 | MGC40170  | hypothetical LOC253128                                                                                                                                                                   | 12 Hs.408739 | 0.859  | 7.236  | 4.741  | 0.000 | 0.0139 | 2.544 |
| 62 | H300013069 | ANLN      | anillin, actin binding protein (scraps homolog, Drosophila)                                                                                                                              | 7 Hs.62180   | 1.396  | 7.198  | 4.685  | 0.000 | 0.0155 | 2.383 |
| 63 | H300000453 | Pfs2      | DNA replication complex GINS protein PSF2                                                                                                                                                | 16 NA        | 1.647  | 13.382 | 4.680  | 0.000 | 0.0155 | 2.369 |

|    |            |          |                                                                                    |              |        |        |        |       |        |       |
|----|------------|----------|------------------------------------------------------------------------------------|--------------|--------|--------|--------|-------|--------|-------|
| 64 | H200007088 | CDKN3    | cyclin-dependent kinase inhibitor 3 (CDK2-associated dual specificity phosphatase) | 14 Hs.84113  | 2.018  | 12.229 | 4.679  | 0.000 | 0.0155 | 2.365 |
| 65 | H200014800 | PKM2     | pyruvate kinase, muscle                                                            | 15 Hs.198281 | 1.229  | 11.090 | 4.673  | 0.000 | 0.0155 | 2.348 |
| 66 | H300013182 | SPAG5    | sperm associated antigen 5                                                         | 17 Hs.514033 | 1.799  | 12.280 | 4.670  | 0.000 | 0.0155 | 2.338 |
| 67 | H300018527 | MCM10    | MCM10 minichromosome maintenance deficient 10 (S. cerevisiae)                      | 10 Hs.198363 | 2.124  | 9.354  | 4.669  | 0.000 | 0.0155 | 2.335 |
| 68 | H300022393 | CDC25C   | cell division cycle 25C                                                            | 5 Hs.558020  | 2.039  | 11.793 | 4.668  | 0.000 | 0.0155 | 2.334 |
| 69 | H300022231 | MYCN     | v-myc myelocytomatosis viral related oncogene, neuroblastoma derived (avian)       | 2 Hs.25960   | 1.045  | 7.529  | 4.670  | 0.000 | 0.0155 | 2.333 |
| 70 | H300022044 | ASPM     | asp (abnormal spindle)-like, microcephaly associated (Drosophila)                  | 1 Hs.121028  | 2.634  | 10.095 | 4.669  | 0.000 | 0.0159 | 2.301 |
| 71 | H300013149 | CDKN3    | cyclin-dependent kinase inhibitor 3 (CDK2-associated dual specificity phosphatase) | 14 Hs.84113  | 1.646  | 8.237  | 4.623  | 0.000 | 0.0174 | 2.204 |
| 72 | H300001740 | ZWINT    | ZW10 interactor                                                                    | 10 Hs.42650  | 1.860  | 9.197  | 4.610  | 0.000 | 0.0175 | 2.167 |
| 73 | H200013875 | ESPL1    | extra spindle poles like 1 (S. cerevisiae)                                         | 12 Hs.153479 | 0.700  | 12.199 | 4.604  | 0.000 | 0.0175 | 2.151 |
| 74 | H300008186 | SNAI1    | snail homolog 1 (Drosophila)                                                       | 20 Hs.48029  | 1.197  | 10.426 | 4.603  | 0.000 | 0.0175 | 2.146 |
| 75 | H200002555 | SPAG5    | sperm associated antigen 5                                                         | 17 Hs.514033 | 2.034  | 11.071 | 4.601  | 0.000 | 0.0175 | 2.140 |
| 76 | H200011605 | ZNF536   | zinc finger protein 536                                                            | 19 Hs.378901 | 0.667  | 6.555  | 4.600  | 0.000 | 0.0175 | 2.137 |
| 77 | H200004431 | MLF1IP   | MLF1 interacting protein                                                           | 4 Hs.481307  | 1.828  | 11.960 | 4.596  | 0.000 | 0.0175 | 2.128 |
| 78 | H200001011 | UBE2T    | ubiquitin-conjugating enzyme E2T (putative)                                        | 1 NA         | 1.587  | 13.188 | 4.568  | 0.000 | 0.0187 | 2.045 |
| 79 | H300021654 | TACC3    | transforming, acidic coiled-coil containing protein 3                              | 4 Hs.104019  | 1.311  | 11.308 | 4.567  | 0.000 | 0.0187 | 2.044 |
| 80 | H300019472 | DCC1     | defective in sister chromatid cohesion homolog 1 (S. cerevisiae)                   | 8 Hs.315167  | 1.603  | 9.457  | 4.533  | 0.000 | 0.0206 | 1.946 |
| 81 | H200015853 | PCGF5    | polycomb group ring finger 5                                                       | 10 NA        | 1.087  | 6.849  | 4.520  | 0.000 | 0.0212 | 1.909 |
| 82 | H200008314 | TH       | tyrosine hydroxylase                                                               | 11 Hs.435609 | 1.890  | 5.732  | 4.516  | 0.000 | 0.0212 | 1.830 |
| 83 | H300016689 | UBE2C    | ubiquitin-conjugating enzyme E2C                                                   | 20 Hs.93002  | 1.447  | 7.273  | 4.500  | 0.000 | 0.0218 | 1.852 |
| 84 | H300003832 | FLJ38723 | hypothetical protein FLJ38723                                                      | 15 Hs.370479 | 2.392  | 7.193  | 4.496  | 0.000 | 0.0218 | 1.842 |
| 85 | H200002312 | STARD13  | START domain containing 13                                                         | 13 Hs.507704 | -1.756 | 10.138 | -4.506 | 0.000 | 0.0218 | 1.837 |
| 86 | H300019042 | ZWINT    | ZW10 interactor                                                                    | 10 Hs.42650  | 1.347  | 11.403 | 4.493  | 0.000 | 0.0218 | 1.831 |

|     |            |           |                                                                                                                                                                                                                       |              |        |        |        |       |        |       |
|-----|------------|-----------|-----------------------------------------------------------------------------------------------------------------------------------------------------------------------------------------------------------------------|--------------|--------|--------|--------|-------|--------|-------|
| 87  | H300013620 | FLJ20171  | hypothetical protein FLJ20171                                                                                                                                                                                         | 8 Hs.487471  | 1.270  | 9.602  | 4.477  | 0.000 | 0.0225 | 1.785 |
| 88  | H200005718 | C20orf129 | chromosome 20 open reading frame 129                                                                                                                                                                                  | 20 NA        | 2.277  | 11.702 | 4.475  | 0.000 | 0.0225 | 1.780 |
| 89  | H300003454 | LOC138412 | similar to ADP,ATP carrier protein, liver isoform T2 (ADP/ATP translocase 3) (Adenine nucleotide translocator 3) (ANT 3)  solute carrier family 25 (mitochondrial carrier; adenine nucleotide translocator), member 6 | 9 Hs.534548  | 0.933  | 9.613  | 4.468  | 0.000 | 0.0227 | 1.761 |
| 90  | H300000073 | C18orf56  | chromosome 18 open reading frame 56                                                                                                                                                                                   | 18 NA        | 1.247  | 9.546  | 4.452  | 0.000 | 0.0237 | 1.715 |
| 91  | H300002712 | LOC283299 | hypothetical protein LOC283299                                                                                                                                                                                        | 11 Hs.501825 | -1.669 | 6.941  | -4.446 | 0.000 | 0.0238 | 1.698 |
| 92  | H200001248 | GPR56     | G protein-coupled receptor 56                                                                                                                                                                                         | 16 Hs.513633 | 1.066  | 11.795 | 4.434  | 0.000 | 0.0238 | 1.664 |
| 93  | H300002144 | APOBEC3B  | apolipoprotein B mRNA editing enzyme, catalytic polypeptide-like 3B                                                                                                                                                   | 22 Hs.226307 | 1.249  | 11.695 | 4.433  | 0.000 | 0.0238 | 1.661 |
| 94  | H200016159 | NA        | NA                                                                                                                                                                                                                    | 6 Hs.555894  | 1.176  | 7.482  | 4.432  | 0.000 | 0.0238 | 1.658 |
| 95  | H200006228 | PGD       | phosphogluconate dehydrogenase                                                                                                                                                                                        | 1 Hs.464071  | 1.328  | 10.860 | 4.427  | 0.000 | 0.0238 | 1.644 |
| 96  | H200011999 | OIP5      | Opa interacting protein 5                                                                                                                                                                                             | 15 NA        | 0.896  | 8.720  | 4.426  | 0.000 | 0.0238 | 1.642 |
| 97  | H300002100 | DERL1     | Der1-like domain family, member 1                                                                                                                                                                                     | 8 Hs.241576  | 1.249  | 8.553  | 4.422  | 0.000 | 0.0238 | 1.631 |
| 98  | H300015925 | DNAH8     | dynein, axonemal, heavy polypeptide 8                                                                                                                                                                                 | 6 Hs.520106  | 0.889  | 13.014 | 4.421  | 0.000 | 0.0238 | 1.626 |
| 99  | H200004071 | MKL1      | megakaryoblastic leukemia (translocation) 1                                                                                                                                                                           | 22 Hs.474905 | 0.799  | 9.985  | 4.420  | 0.000 | 0.0238 | 1.623 |
| 100 | H300016661 | WDR68     | WD repeat domain 68                                                                                                                                                                                                   | 17 Hs.410596 | 0.926  | 8.820  | 4.405  | 0.000 | 0.0247 | 1.581 |
| 101 | H200013113 | NEIL3     | nei endonuclease VIII-like 3 (E. coli)                                                                                                                                                                                | 4 Hs.405467  | 1.127  | 9.840  | 4.397  | 0.000 | 0.0251 | 1.559 |
| 102 | H300004556 | NRM       | nurim (nuclear envelope membrane protein)                                                                                                                                                                             | 6 Hs.519993  | 1.537  | 10.053 | 4.390  | 0.000 | 0.0253 | 1.539 |
| 103 | H200009956 | KIF18A    | kinesin family member 18A                                                                                                                                                                                             | 11 Hs.301052 | 1.248  | 9.717  | 4.386  | 0.000 | 0.0253 | 1.527 |
| 104 | H300015612 | NA        | NA                                                                                                                                                                                                                    | 3 NA         | 0.902  | 11.367 | 4.385  | 0.000 | 0.0253 | 1.525 |
| 105 | H300018824 | FLJ23554  | hypothetical protein FLJ23554                                                                                                                                                                                         | 11 Hs.164705 | -1.371 | 7.579  | -4.382 | 0.000 | 0.0253 | 1.517 |



|     |            |          |                                                           |    |           |        |        |        |       |        |       |
|-----|------------|----------|-----------------------------------------------------------|----|-----------|--------|--------|--------|-------|--------|-------|
| 106 | H300017497 | PGD      | phosphogluconate dehydrogenase                            | 1  | Hs.464071 | 0.897  | 14.737 | 4.374  | 0.000 | 0.0257 | 1.493 |
| 107 | H200017889 | SPON2    | spondin 2, extracellular matrix protein                   | 4  | NA        | -0.415 | 7.061  | -4.359 | 0.000 | 0.0266 | 1.452 |
| 108 | H300017624 | NA       | NA                                                        | 20 | NA        | 1.914  | 4.614  | 4.914  | 0.000 | 0.0266 | 0.019 |
| 109 | H300004245 | C6orf173 | chromosome 6 open reading frame 173                       | 6  | NA        | 1.375  | 11.217 | 4.348  | 0.000 | 0.0271 | 1.421 |
| 110 | H200000213 | SOX2     | SRY (sex determining region Y)-box 2                      | 3  | Hs.518438 | 1.632  | 9.614  | 4.341  | 0.000 | 0.0273 | 1.401 |
| 111 | H200010931 | ATP6V0A4 | ATPase, H+ transporting, lysosomal V0 subunit a isoform 4 | 7  | Hs.98967  | 2.305  | 9.694  | 4.340  | 0.000 | 0.0273 | 1.399 |
| 112 | H300018716 | FLJ20171 | hypothetical protein FLJ20171                             | 8  | Hs.487471 | 1.330  | 10.654 | 4.326  | 0.000 | 0.0283 | 1.358 |
| 113 | H200006364 | CENPF    | centromere protein F, 350/400ka (mitosin)                 | 1  | Hs.497741 | 1.635  | 13.014 | 4.318  | 0.000 | 0.0283 | 1.337 |
| 114 | H300021140 | RECQL4   | RecQ protein-like 4                                       | 8  | Hs.31442  | 1.584  | 13.026 | 4.318  | 0.000 | 0.0283 | 1.335 |
| 115 | H200007867 | TTK      | TTK protein kinase                                        | 6  | Hs.169840 | 1.438  | 10.324 | 4.317  | 0.000 | 0.0283 | 1.333 |
| 116 | H200019588 | CDC2     | cell division cycle 2, G1 to S and G2 to M                | 10 | Hs.334562 | 1.667  | 8.993  | 4.310  | 0.000 | 0.0285 | 1.313 |
| 117 | H200017465 | PIR      | pirin (iron-binding nuclear protein)                      | 23 | NA        | 1.858  | 11.959 | 4.309  | 0.000 | 0.0285 | 1.310 |
| 118 | H300005079 | NA       | NA                                                        | 8  | Hs.291342 | -1.827 | 6.064  | -4.307 | 0.000 | 0.0285 | 1.287 |
| 119 | H300003913 | TOMM34   | translocase of outer mitochondrial membrane 34            | 20 | Hs.517066 | 1.020  | 8.340  | 4.300  | 0.000 | 0.0289 | 1.285 |
| 120 | H200008233 | NA       | NA                                                        | 1  | NA        | 1.471  | 9.581  | 4.292  | 0.000 | 0.0293 | 1.264 |
| 121 | H200017742 | PRO1855  | hypothetical protein PRO1855                              | 17 | Hs.370927 | 1.425  | 14.644 | 4.289  | 0.000 | 0.0294 | 1.254 |
| 122 | H300006435 | NRM      | nurim (nuclear envelope membrane protein)                 | 6  | Hs.519993 | 1.445  | 9.642  | 4.282  | 0.000 | 0.0298 | 1.234 |
| 123 | H300017569 | FANCD2   | Fanconi anemia, complementation group D2                  | 3  | Hs.208388 | 0.712  | 9.893  | 4.264  | 0.000 | 0.0312 | 1.185 |
| 124 | H200003347 | CCNB1    | cyclin B1                                                 | 5  | Hs.23960  | 1.224  | 10.427 | 4.253  | 0.000 | 0.0319 | 1.152 |
| 125 | H300017969 | Kua      | ubiquitin-conjugating enzyme variant Kua                  | 20 | NA        | 1.059  | 13.593 | 4.253  | 0.000 | 0.0319 | 1.152 |
| 126 | H200006074 | PHB      | prohibitin                                                | 17 | NA        | 1.661  | 9.488  | 4.246  | 0.000 | 0.0323 | 1.133 |
| 127 | H200009953 | CABLES2  | Cdk5 and Abl enzyme substrate 2                           | 20 | Hs.301040 | 1.389  | 12.897 | 4.233  | 0.000 | 0.0333 | 1.098 |
| 128 | H200004242 | ISYNA1   | myo-inositol 1-phosphate synthase A1                      | 19 | Hs.405873 | 1.316  | 11.177 | 4.225  | 0.000 | 0.0337 | 1.075 |
| 129 | H300003438 | HSHIN1   | HIV-1 induced protein HIN-1                               | 12 | Hs.270851 | 0.626  | 6.956  | 4.225  | 0.000 | 0.0337 | 1.074 |

|     |            |              |                                                            |    |           |        |        |        |       |        |        |
|-----|------------|--------------|------------------------------------------------------------|----|-----------|--------|--------|--------|-------|--------|--------|
| 130 | H200006619 | MAD2L1       | MAD2 mitotic arrest deficient-like 1 (yeast)               | 4  | NA        | 1.714  | 10.335 | 4.215  | 0.000 | 0.0343 | 1.048  |
| 131 | H300005780 | E2F4         | E2F transcription factor 4, p107/p130-binding              | 16 | Hs.108371 | 1.020  | 7.489  | 4.215  | 0.000 | 0.0343 | 1.046  |
| 132 | H200014130 | CLUAP1       | clusterin associated protein 1                             | 16 | Hs.155995 | -1.328 | 12.210 | -4.203 | 0.000 | 0.0351 | 1.013  |
| 133 | H300009402 | VPS13C       | vacuolar protein sorting 13C (yeast)                       | 15 | Hs.511668 | 0.603  | 6.940  | 4.202  | 0.000 | 0.0351 | 1.011  |
| 134 | H200006714 | TNFRSF19L    | tumor necrosis factor receptor superfamily, member 19-like | 11 | Hs.533720 | 0.998  | 7.280  | 4.198  | 0.000 | 0.0353 | 0.999  |
| 135 | H300021601 | FANCB        | Fanconi anemia, complementation group B                    | 23 | Hs.445921 | 0.961  | 9.292  | 4.194  | 0.000 | 0.0354 | 0.989  |
| 136 | H200006122 | NP           | nucleoside phosphorylase                                   | 14 | Hs.75514  | 0.929  | 9.102  | 4.187  | 0.000 | 0.0359 | 0.970  |
| 137 | H300020810 | TPCN2        | two pore segment channel 2                                 | 11 | Hs.387396 | 1.448  | 9.654  | 4.183  | 0.000 | 0.0361 | 0.959  |
| 138 | H200014576 | HCAP-G       | chromosome condensation protein G                          | 4  | Hs.479270 | 1.549  | 10.415 | 4.181  | 0.000 | 0.0361 | 0.951  |
| 139 | H300020785 | RAD52B       | RAD52 homolog B (S. cerevisiae)                            | 17 | Hs.194411 | 2.297  | 10.666 | 4.183  | 0.000 | 0.0367 | 0.934  |
| 140 | H200009627 | GAJ          | GAJ protein                                                | 4  | Hs.294088 | 1.240  | 8.772  | 4.166  | 0.000 | 0.0372 | 0.911  |
| 141 | H200006371 | EZH2         | enhancer of zeste homolog 2 (Drosophila)                   | 7  | NA        | 0.803  | 9.451  | 4.155  | 0.000 | 0.0378 | 0.881  |
| 142 | H200020461 | RAF1         | v-raf-1 murine leukemia viral oncogene homolog 1           | 3  | Hs.159130 | 0.593  | 10.981 | 4.153  | 0.000 | 0.0378 | 0.875  |
| 143 | H300004838 | ZFP276       | zinc finger protein 276 homolog (mouse)                    | 16 | Hs.290154 | 1.713  | 11.426 | 4.152  | 0.000 | 0.0378 | 0.871  |
| 144 | H300000820 | FLJ23657     | hypothetical protein FLJ23657                              | 4  | Hs.24510  | 2.287  | 4.879  | 4.694  | 0.000 | 0.0378 | -0.038 |
| 145 | H300021996 | DEPDC1       | DEP domain containing 1                                    | 1  | Hs.445098 | 1.131  | 10.100 | 4.134  | 0.000 | 0.0397 | 0.821  |
| 146 | H300005578 | RPL23        | ribosomal protein L23                                      | 17 | Hs.512542 | -0.694 | 15.173 | -4.128 | 0.000 | 0.0402 | 0.804  |
| 147 | H300001915 | ADCY3  MGC13 | adenylate cyclase<br>hypothetical protein MGC11266         | 2  | Hs.546428 | 1.100  | 12.013 | 4.125  | 0.000 | 0.0403 | 0.796  |
| 148 | H200014873 | C14orf105    | chromosome 14 open reading frame 105                       | 14 | Hs.146040 | 0.749  | 8.362  | 4.122  | 0.000 | 0.0403 | 0.789  |
| 149 | H200005265 | DOC2A        | double C2-like domains, alpha                              | 16 | Hs.355281 | -2.418 | 11.314 | -4.120 | 0.000 | 0.0403 | 0.783  |
| 150 | H200008215 | NA           | NA                                                         | 3  | Hs.506115 | -1.415 | 6.895  | -4.106 | 0.000 | 0.0419 | 0.743  |
| 151 | H300018882 | DAP          | death-associated protein                                   | 5  | Hs.75189  | 0.773  | 9.406  | 4.099  | 0.000 | 0.0425 | 0.725  |
| 152 | H300015276 | BM039        | uncharacterized bone marrow protein BM039                  | 16 | NA        | 1.052  | 10.374 | 4.092  | 0.000 | 0.0430 | 0.706  |

|     |            |           |                                                                                       |    |           |       |        |       |       |        |       |
|-----|------------|-----------|---------------------------------------------------------------------------------------|----|-----------|-------|--------|-------|-------|--------|-------|
| 153 | H200014581 | GSG2      | germ cell associated 2 (haspin)                                                       | 17 | NA        | 1.475 | 8.746  | 4.090 | 0.000 | 0.0430 | 0.700 |
| 154 | H300012266 | MGC3130   | hypothetical protein MGC3130                                                          | 17 | Hs.437059 | 0.963 | 9.955  | 4.098 | 0.000 | 0.0430 | 0.700 |
| 155 | H300016532 | UBE1      | ubiquitin-activating enzyme E1 (A1S9T and BN75 temperature sensitivity complementing) | 23 | NA        | 0.507 | 10.255 | 4.086 | 0.000 | 0.0431 | 0.688 |
| 156 | H200015577 | HOXD9     | homeo box D9                                                                          | 2  | Hs.236646 | 0.765 | 7.665  | 4.081 | 0.000 | 0.0435 | 0.675 |
| 157 | H200016261 | STK6      | serine/threonine kinase 6                                                             | 20 | Hs.250822 | 1.013 | 13.012 | 4.065 | 0.000 | 0.0453 | 0.632 |
| 158 | H300021781 | CENPA     | centromere protein A, 17kDa                                                           | 2  | NA        | 1.436 | 10.905 | 4.058 | 0.000 | 0.0461 | 0.611 |
| 159 | H300022861 | ISGF3G    | interferon-stimulated transcription factor 3, gamma 48kDa                             | 14 | Hs.1706   | 0.965 | 10.506 | 4.054 | 0.000 | 0.0464 | 0.599 |
| 160 | H200012451 | SHCBP1    | SHC SH2-domain binding protein 1                                                      | 16 | Hs.123253 | 1.360 | 10.649 | 4.052 | 0.000 | 0.0464 | 0.595 |
| 161 | H300018657 | C14orf93  | chromosome 14 open reading frame 93                                                   | 14 | Hs.255874 | 0.704 | 9.762  | 4.048 | 0.000 | 0.0467 | 0.583 |
| 162 | H300002155 | K-ALPHA-1 | tubulin alpha 6                                                                       | 11 | Hs.524390 | 1.070 | 13.576 | 4.046 | 0.000 | 0.0467 | 0.578 |
| 163 | H300006913 | UBE2S     | tubulin, alpha, ubiquitous ubiquitin-conjugating enzyme E2S                           | 17 | Hs.462306 | 1.681 | 11.387 | 4.040 | 0.000 | 0.0470 | 0.562 |
| 164 | H200014857 | EPN3      | epsin 3                                                                               | 17 | Hs.165904 | 1.299 | 7.471  | 4.040 | 0.000 | 0.0470 | 0.561 |
| 165 | H200007997 | PVR       | poliovirus receptor                                                                   | 19 | Hs.171844 | 0.988 | 8.420  | 4.036 | 0.000 | 0.0472 | 0.550 |
| 166 | H300005525 | RRM2      | ribonucleotide reductase M2 polypeptide                                               | 23 | Hs.226390 | 0.719 | 8.757  | 4.032 | 0.000 | 0.0475 | 0.542 |
| 167 | H200000527 | UBE1      | ubiquitin-activating enzyme E1 (A1S9T and BN75 temperature sensitivity complementing) | 23 | Hs.533273 | 0.901 | 12.591 | 4.015 | 0.000 | 0.0496 | 0.492 |
| 168 | H300020183 | TOP2A     | topoisomerase (DNA) II alpha 170kDa                                                   | 17 | Hs.156346 | 1.050 | 7.226  | 4.013 | 0.000 | 0.0496 | 0.487 |
| 169 | H300005394 | FTL       | ferritin, light polypeptide                                                           | 20 | Hs.495896 | 0.852 | 14.247 | 4.019 | 0.000 | 0.0496 | 0.482 |
| 170 | H300004609 | FLJ35801  | hypothetical protein FLJ35801                                                         | 22 | Hs.120446 | 1.102 | 8.531  | 4.009 | 0.000 | 0.0496 | 0.478 |
| 171 | H200015043 | C22orf18  | chromosome 22 open reading frame 18                                                   | 22 | Hs.208912 | 0.891 | 9.600  | 4.006 | 0.000 | 0.0496 | 0.469 |

|     |            |                                                                                                                                                                                                      |                               |             |       |       |       |        |        |       |
|-----|------------|------------------------------------------------------------------------------------------------------------------------------------------------------------------------------------------------------|-------------------------------|-------------|-------|-------|-------|--------|--------|-------|
| 172 | H300021877 | DDX11  DDX1:DEAD/H (Asp-Glu-Ala-Asp/His) box polypeptide 11 (CHL1-like helicase homolog, S. cerevisiae)  DEAD/H (Asp-Glu-Ala-Asp/His) box polypeptide 12 (CHL1-like helicase homolog, S. cerevisiae) | 12 Hs.504688                  | 1.035       | 9.192 | 4.005 | 0.000 | 0.0496 | 0.465  |       |
| 173 | H200011199 | IL1RL2                                                                                                                                                                                               | interleukin 1 receptor-like 2 | 2 Hs.469520 | 0.458 | 8.593 | 4.005 | 0.000  | 0.0496 | 0.465 |

| Column Name             | Description                                                                      |
|-------------------------|----------------------------------------------------------------------------------|
| oligo                   | Oligo identifier from manufacturer                                               |
| symbol_from_entrez_gene | The gene symbol extracted from NCBI (should be the HUGO gene name in most cases) |
| unigene                 | Unigene identifier                                                               |
| M                       | Estimated log2(fold change) for ER+ versus ER- (for example)                     |
| A                       | log2(average intensity) for the probe (reported but not used)                    |
| t                       | The t-statistic (moderated) (reported but not used)                              |
| P.Value                 | The raw p-value (reported but not used)                                          |
| adj.P.Val               | The false-discovery-rate (FDR), so corrected for multiple testing                |
| B                       | The log(odds) of differential expression (reported, but not used)                |

**Supplementary Table 3: Gene ontology enrichment analysis of differentially expressed genes**

| System                    | Category                                     | EASE Score<br>(P-value) <sup>a</sup> | List Hits<br>(LH) <sup>b</sup> | List Total<br>(LT) <sup>c</sup> | Population<br>Hits (PH) <sup>d</sup> | Population<br>Total (PT) <sup>e</sup> |
|---------------------------|----------------------------------------------|--------------------------------------|--------------------------------|---------------------------------|--------------------------------------|---------------------------------------|
| <b>Biological Process</b> |                                              |                                      |                                |                                 |                                      |                                       |
|                           | mitotic cell cycle                           | 1.36E-18                             | 25                             | 77                              | 266                                  | 8700                                  |
|                           | cell cycle                                   | 3.71E-17                             | 31                             | 77                              | 550                                  | 8700                                  |
|                           | mitosis                                      | 4.91E-15                             | 16                             | 77                              | 101                                  | 8700                                  |
|                           | M phase of mitotic cell cycle                | 6.65E-15                             | 16                             | 77                              | 103                                  | 8700                                  |
|                           | nuclear division                             | 9.11E-15                             | 17                             | 77                              | 128                                  | 8700                                  |
|                           | M phase                                      | 1.79E-14                             | 17                             | 77                              | 133                                  | 8700                                  |
|                           | cell proliferation                           | 3.47E-13                             | 32                             | 77                              | 826                                  | 8700                                  |
|                           | regulation of cell cycle                     | 7.17E-09                             | 17                             | 77                              | 310                                  | 8700                                  |
|                           | cell growth and/or maintenance               | 1.19E-08                             | 48                             | 77                              | 2639                                 | 8700                                  |
|                           | cellular physiological process               | 0.00000019                           | 50                             | 77                              | 3070                                 | 8700                                  |
|                           | DNA metabolism                               | 0.00000123                           | 16                             | 77                              | 395                                  | 8700                                  |
|                           | regulation of mitosis                        | 0.00000166                           | 6                              | 77                              | 24                                   | 8700                                  |
|                           | DNA replication and chromosome cycle         | 0.0000038                            | 10                             | 77                              | 143                                  | 8700                                  |
|                           | cytokinesis                                  | 0.00000608                           | 8                              | 77                              | 81                                   | 8700                                  |
|                           | cellular process                             | 0.0000797                            | 59                             | 77                              | 4767                                 | 8700                                  |
|                           | G2/M transition of mitotic cell cycle        | 0.000468                             | 5                              | 77                              | 42                                   | 8700                                  |
|                           | cell cycle checkpoint                        | 0.0022                               | 4                              | 77                              | 30                                   | 8700                                  |
|                           | response to DNA damage stimulus              | 0.00235                              | 7                              | 77                              | 156                                  | 8700                                  |
|                           | response to endogenous stimulus              | 0.00275                              | 7                              | 77                              | 161                                  | 8700                                  |
|                           | chromosome condensation                      | 0.0047                               | 3                              | 77                              | 12                                   | 8700                                  |
|                           | DNA repair                                   | 0.00546                              | 6                              | 77                              | 130                                  | 8700                                  |
|                           | G1 phase of mitotic cell cycle               | 0.0064                               | 3                              | 77                              | 14                                   | 8700                                  |
|                           | DNA replication                              | 0.0155                               | 5                              | 77                              | 110                                  | 8700                                  |
|                           | S phase of mitotic cell cycle                | 0.0159                               | 5                              | 77                              | 111                                  | 8700                                  |
|                           | regulation of CDK activity                   | 0.0392                               | 3                              | 77                              | 36                                   | 8700                                  |
|                           | transcription from Pol II promoter           | 0.0464                               | 8                              | 77                              | 378                                  | 8700                                  |
| <b>Cellular Component</b> |                                              |                                      |                                |                                 |                                      |                                       |
|                           | microtubule cytoskeleton                     | 0.00000289                           | 10                             | 67                              | 144                                  | 7813                                  |
|                           | nucleus                                      | 0.0000161                            | 37                             | 67                              | 2298                                 | 7813                                  |
|                           | spindle                                      | 0.000249                             | 5                              | 67                              | 37                                   | 7813                                  |
|                           | intracellular chromosome, pericentric region | 0.000273                             | 53                             | 67                              | 4519                                 | 7813                                  |
|                           | chromosome region                            | 0.000592                             | 4                              | 67                              | 20                                   | 7813                                  |
|                           | chromosome cytoskeleton                      | 0.00829                              | 6                              | 67                              | 149                                  | 7813                                  |
|                           | cytoskeleton                                 | 0.0179                               | 10                             | 67                              | 476                                  | 7813                                  |
|                           | microtubule associated complex               | 0.0279                               | 4                              | 67                              | 78                                   | 7813                                  |

**Molecular Function**

|                              |        |    |    |      |      |
|------------------------------|--------|----|----|------|------|
| ATP binding                  | 0.0264 | 13 | 68 | 900  | 9264 |
| DNA binding                  | 0.0275 | 18 | 68 | 1457 | 9264 |
| adenyl nucleotide<br>binding | 0.0287 | 13 | 68 | 911  | 9264 |
| motor activity               | 0.0482 | 4  | 68 | 113  | 9264 |

---

<sup>a</sup> EASE Score (P-value) represents the level of confidence that this term is over-represented in the DCIS discriminative gene list

<sup>b</sup> LH - number of genes with this term in the DCIS discriminative gene list

<sup>c</sup> LT - number of genes in the DCIS discriminative gene list mapped to any term in this ontology ("system")

<sup>d</sup> PH - number of genes with this gene ontology term on the background gene list (ie. the entire oligonucleotide microarray)

<sup>e</sup> PT - number of genes on the entire oligonucleotide microarray mapped to any term in this ontology ("system")
